# Supplementary material for: Highly sensitive and selective turn-on fluorescent chemosensor for Pb2+ and Hg2+ based on a rhodamine–phenylurea conjugate
Source: Royal Society of Chemistry journal article supplement (doi:10.1039/c001587c), 2010-01-01
Supplement: c001587c.pdf [file c001587c.pdf]

**Supporting Information**  
**Highly Sensitive and Selective Turn-on Fluorescent**  
**Chemosensor for Pb<sup>2+</sup> and Hg<sup>2+</sup> Based on**  
**Rhodamine-phenylurea conjugate**

**Zhi-Qiang Hu, \*†Cun-sheng Lin, † Xiao-Ming Wang, † Lei Ding, † Cun-Li Cui, †**  
**Shu-Feng Liu\*† and Hai-Yan Lu\*†**

*†College of Chemistry and Molecular Engineering, Qingdao University of Science and  
Technology, Qingdao 266042, China*

*‡ College of Chemistry and Chemical Engineering, Graduate University of Chinese  
Academy of Sciences, Beijing 100049, China.*

[huzhiqiang@iccas.ac.cn](mailto:huzhiqiang@iccas.ac.cn); [haiyanlu@gucas.ac.cn](mailto:haiyanlu@gucas.ac.cn)

**Contents**

|                                                                                |         |
|--------------------------------------------------------------------------------|---------|
| 1. Apparatus and reagents -----                                                | page S2 |
| 2. Synthesis and structural characterization of <b>RPU and RPTU</b> -----      | page S2 |
| 3. General procedure for Pb <sup>2+</sup> and Hg <sup>2+</sup> detection ----- | page S2 |
| 4. Figure S1-----                                                              | page S4 |
| 5. Figure S2-----                                                              | page S5 |
| 6. Figure S3-----                                                              | page S5 |
| 7. Figure S4-----                                                              | page S6 |
| 8. Figure S5-----                                                              | page S6 |
| 9. Figure S6-----                                                              | page S7 |

|     |            |       |          |
|-----|------------|-------|----------|
| 10  | Figure S7  | ----- | page S7  |
| 11. | Figure S8  | ----- | page S8  |
| 12. | Figure S9  | ----- | page S8  |
| 13. | Figure S10 | ----- | page S9  |
| 14. | Figure S11 | ----- | page S10 |
| 15. | Figure S12 | ----- | page S10 |
| 16. | Figure S13 | ----- | page S11 |
| 17. | Figure S14 | ----- | page S11 |
| 18. | Figure S15 | ----- | page S12 |
| 19. | Figure S16 | ----- | page S12 |
| 20. | Figure S17 | ----- | page S13 |
| 20. | Figure S18 | ----- | page S13 |
| 20. | Figure S19 | ----- | page S14 |

### **1. Apparatus and reagents**

A Hitachi F-2500 spectrofluorimeter was used for fluorescence measurements. The absorption spectra were recorded with a Techcomp UV-8500 spectrophotometer (Shanghai, China). NMR spectra were measured on a Bruker DMX-500 spectrometer at 500 MHz in CD<sub>3</sub>COCD<sub>3</sub>. Elemental analyses were carried out with a Flash EA 1112 instrument. A Delta 320 pH-meter [Mettler-Toledo Instruments (Shanghai) Co., China] was used for pH measurements. All other chemicals used were local products of analytical grade. The solutions of metal ions were prepared from their perchlorate salts. All solvent used in spectroscopic test are spectroscopic grade. Distilled-deionized water

was used throughout the experiment.

## 2. Synthesis and structural characterization of RPU

Rhodamine B (0.88g, 2mmol) was refluxed in POCl<sub>3</sub>(15mL) for 4h, and concentrated by evaporation. The obtained crude acid chloride was dissolved in ClCH<sub>2</sub>CH<sub>2</sub>Cl( 20mL). NH<sub>3</sub> was pumped into the acid chloride solution until the reaction ended. Water was added to the resultant, and the aqueous phase was extracted with ClCH<sub>2</sub>CH<sub>2</sub>Cl. The organic layer was washed with water twice, dried over Na<sub>2</sub>SO<sub>4</sub>, and concentrated by evaporation. The residue was dissolved in dry toluene, PhNCO (2mL, 18.4mmol) was added dropwise. At the end of the addition, the mixture was refluxed for 4 hrs. After the solvent was removed by evaporation, the residue was purified by silica gel column chromatography with EtOAc/Cyclohexane (1/40, v/v) as eluent, affording **RPU** as a white solid 0.53g, yield 47%. m.p.: 198-200°C. <sup>1</sup>H NMR(CD<sub>3</sub>COCD<sub>3</sub>, 500MHz, TMS ) : δ = 1.14(t, *J* = 7Hz, 12H); 3.38(q, *J* = 7Hz, 8H); 6.30(d, *J* = 7.5Hz, 2H); 6.40 (s, 2H); 6.48(d, *J* = 7.5Hz, 2H); 7.00 (t, *J* = 7.5Hz, 1H); 7.13 (d, *J* = 7.5Hz, 1H); 7.24 (t, *J* = 7.5Hz, 2H); 7.46 (d, *J* = 8Hz, 2H); 7.64 (t, *J* = 8Hz, 1H); 7.72 (t, *J* = 7Hz, 1H); 8.02 (d, *J* = 8Hz, 1H); 10.92 (s, 1H). <sup>13</sup>C NMR(CD<sub>3</sub>COCD<sub>3</sub>, 250MHz, TMS ) : δ 169.9, 154.0, 153.4, 148.7, 148.4, 138.3, 135.3, 129.0, 128.9, 128.7, 127.4, 124.5, 123.7, 123.3, 119.1, 107.3, 107.1, 97.7, 65.9, 44.0, 12.0. ESI-MS 561.4 [M + H]<sup>+</sup>; Anal. Calcd for C<sub>35</sub>H<sub>36</sub>N<sub>4</sub>O<sub>3</sub>: C, 74.98; H, 6.47; N, 9.99; Found: C, 74.47; H, 6.65; N, 9.82.

## 2. Synthesis and structural characterization of RPTU

Through the similar way, RPTU can be synthesized as a yellow solid in 54% yield. m.p.: 194-195°C. <sup>1</sup>H NMR(CD<sub>3</sub>COCD<sub>3</sub>, 500MHz, TMS ) : δ = 1.14(t, *J* = 7.0Hz, 12H); 3.37(q, *J* = 7.0Hz, 8H); 6.29(d, *J* = 9.0Hz, 2H); 6.35 (s, 2H); 6.49(d, *J* = 8.0Hz, 2H); 7.03 (d, *J* = 8.0Hz, 1H); 7.16(t, *J* = 7.5Hz, 1H); 7.31 (t, *J* = 7.5Hz, 2H); 7.63-7.59 (m, 3H); 7.69 (t, *J* = 7.5Hz, 1H); 8.02 (d, *J* = 7.5Hz, 1H); 13.05 (s, 1H). <sup>13</sup>C NMR(CD<sub>3</sub>COCD<sub>3</sub>, 250MHz, TMS ) : δ 176.7, 170.8, 155.1, 153.1, 148.7, 138.7, 135.4, 128.8, 128.5, 127.1, 127.0, 125.7, 124.6, 124.0, 123.9, 107.6, 107.3, 97.4, 69.6, 44.0, 12.1. ESI-MS 577.4 [M + H]<sup>+</sup>; Anal. Calcd for C<sub>35</sub>H<sub>36</sub>N<sub>4</sub>O<sub>2</sub>S: C, 72.89; H, 6.29; N, 9.71; Found: C, 72.67; H, 6.43; N, 9.56.

### 3. General procedure for Pb<sup>2+</sup> detection

A  $1.0 \times 10^{-3}$  M stock solution of compound **RPU** was prepared in CH<sub>3</sub>CN. To 10-mL glass tubes containing different amounts of metal ions, proper amounts of the solution of **RPU** was added directly with a micropipette. The solutions were diluted with CH<sub>3</sub>CN to 10 mL and mixed, then the absorption and fluorescence sensing of metal ions were run immediately.

### 4. General procedure for Hg<sup>2+</sup> detection

A  $1.0 \times 10^{-3}$  M stock solution of compound **RPU** was prepared in CH<sub>3</sub>CN. To 10-mL glass tubes containing different amounts of metal ions, proper amounts of the solution of **RPU** was added directly with a micropipette. The solutions were diluted with CH<sub>3</sub>CN and H<sub>2</sub>O to 10 mL and mixed, then the absorption and fluorescence sensing of metal ions were run immediately.

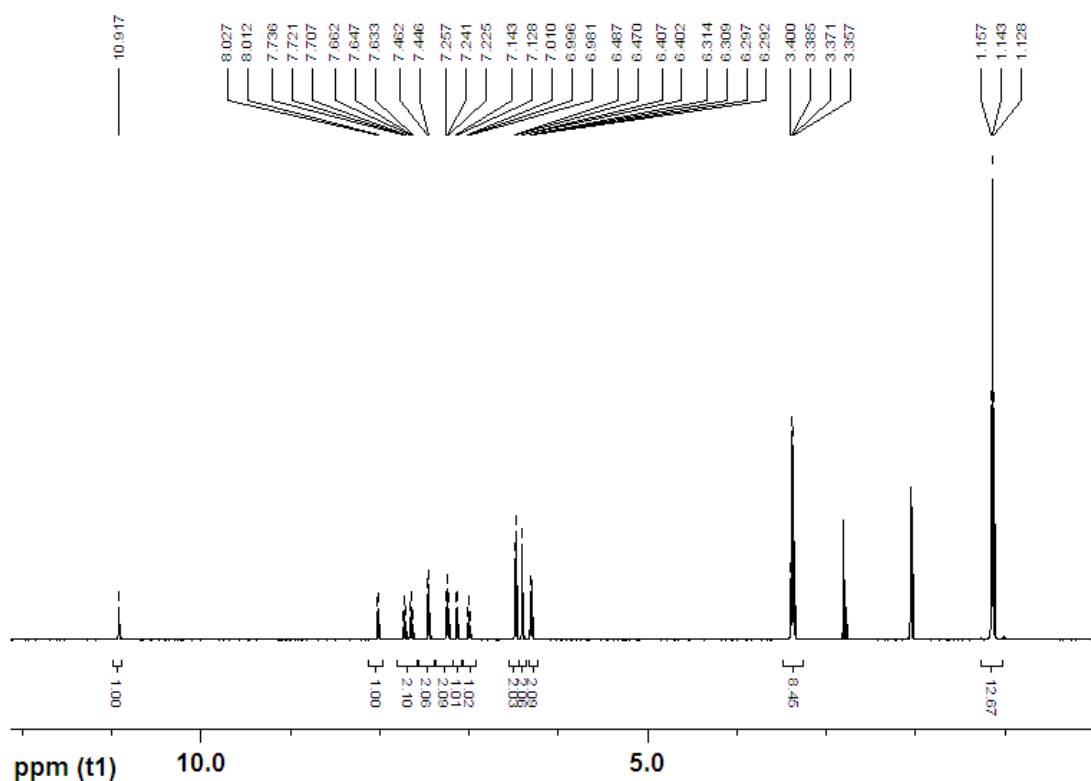

Fig. S1 <sup>1</sup>H NMR of RPU

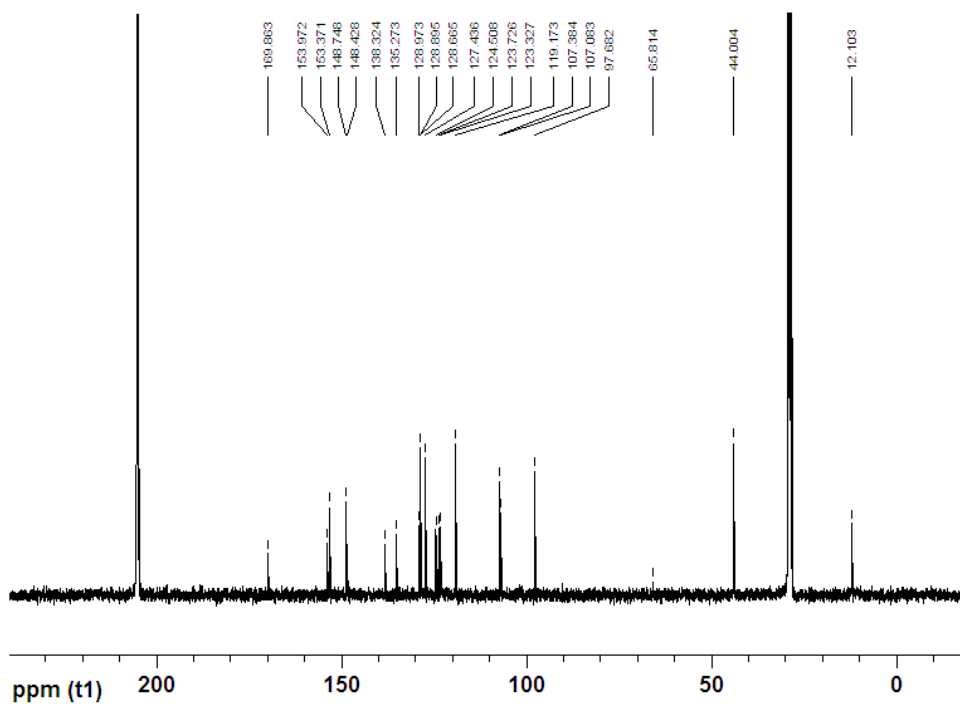

Fig. S2  $^{13}\text{C}$  NMR of RPU

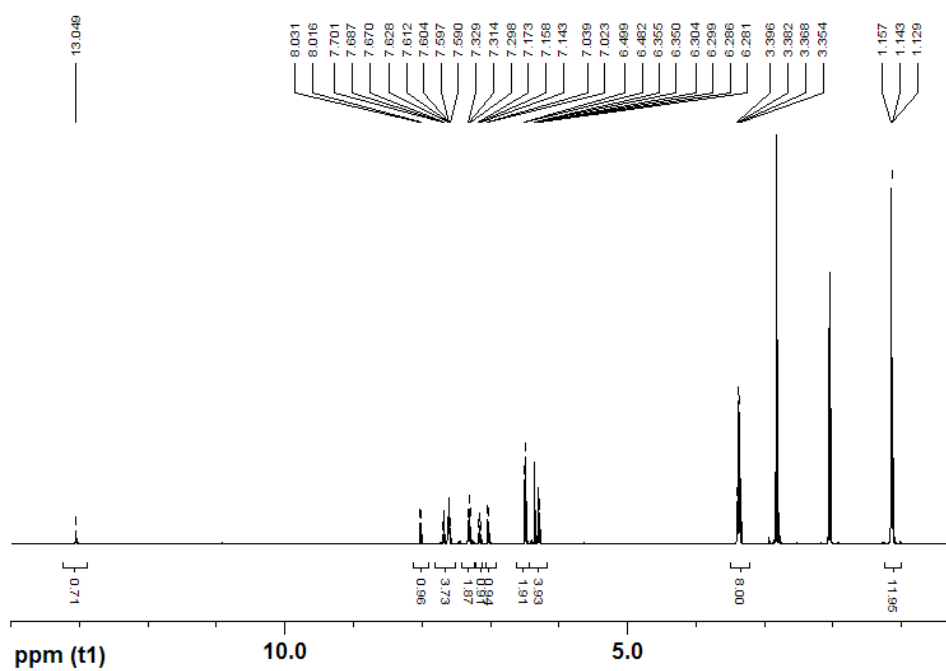

Fig. S3  $^1\text{H}$  NMR of RPTU

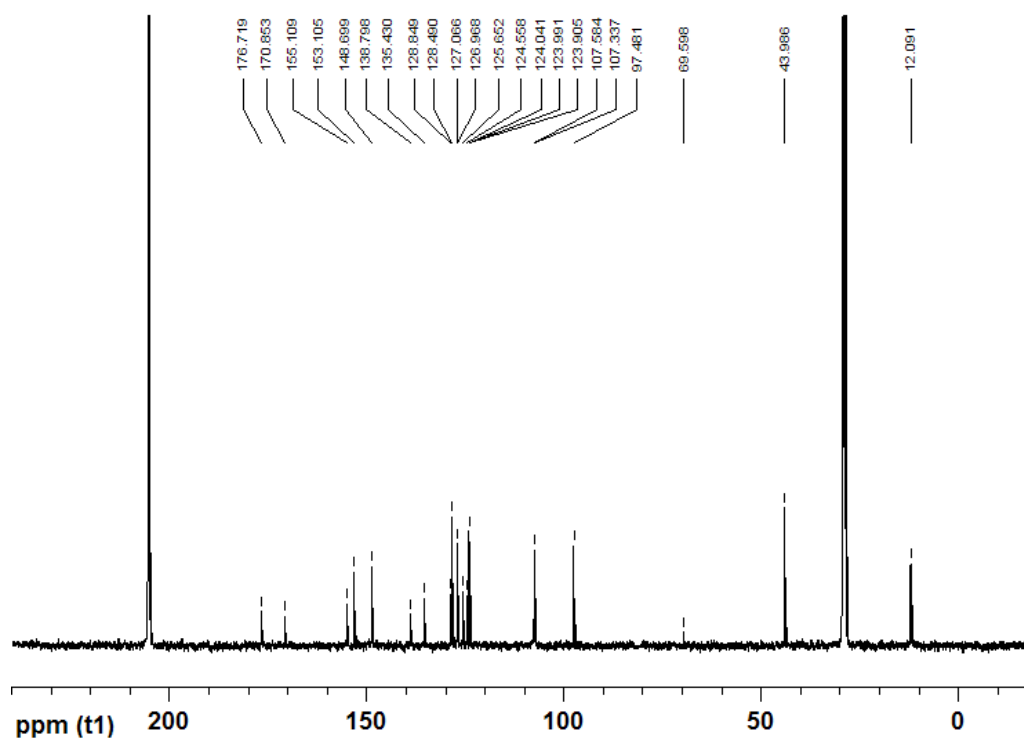

Fig. S4  $^{13}\text{C}$  NMR of RPTU

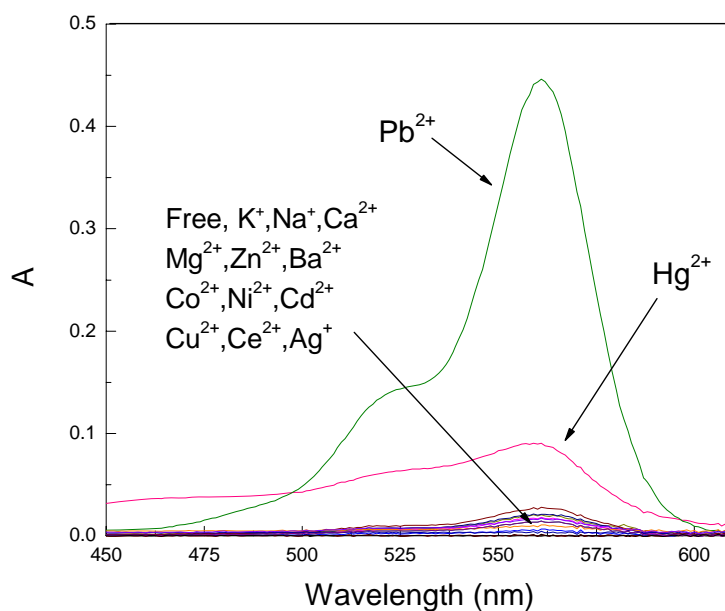

Fig. S5 Absorption spectra of **RPU** ( $10\ \mu\text{M}$ ) upon addition of respective metal ions (as perchlorate salt, 50 equiv.) in  $\text{CH}_3\text{CN}$ .

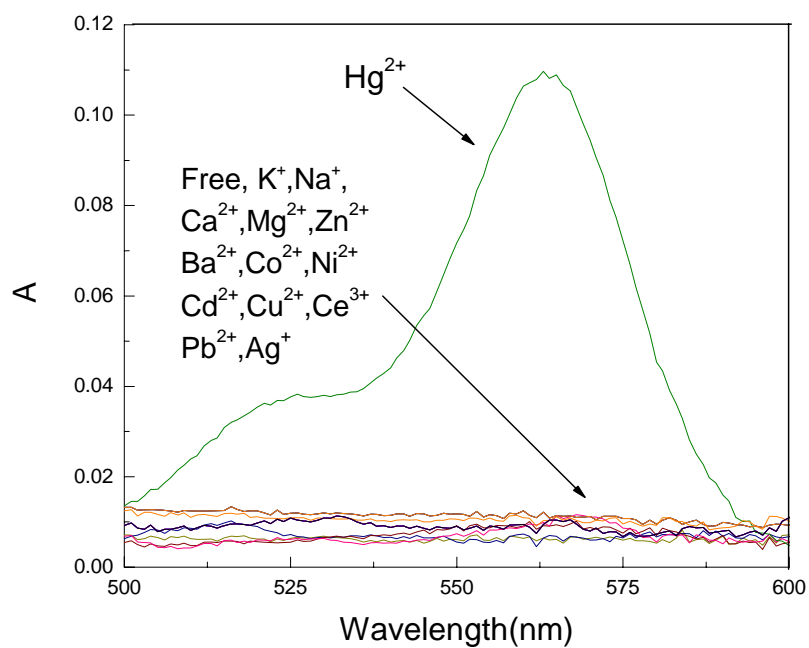

Fig. S6 Absorption spectra of **RPU** (10 μM) upon addition of respective metal ions (as perchlorate salt, 50 equiv.) in CH<sub>3</sub>CN/H<sub>2</sub>O (3/7, v/v).

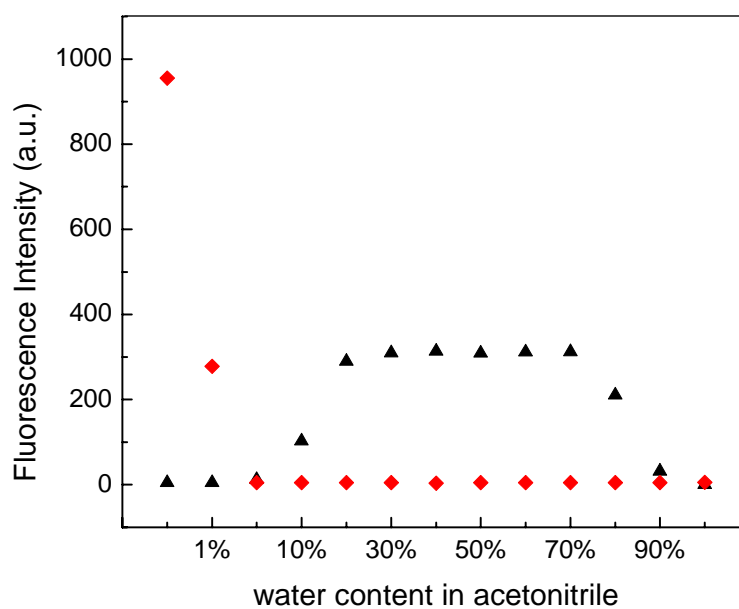

Fig. S7 Fluorescence responses of **RPU**(1 μM) toward 100 μM Pb<sup>2+</sup> (◆) and 130 μM Hg<sup>2+</sup> (▲) as the function of water content in acetonitrile.

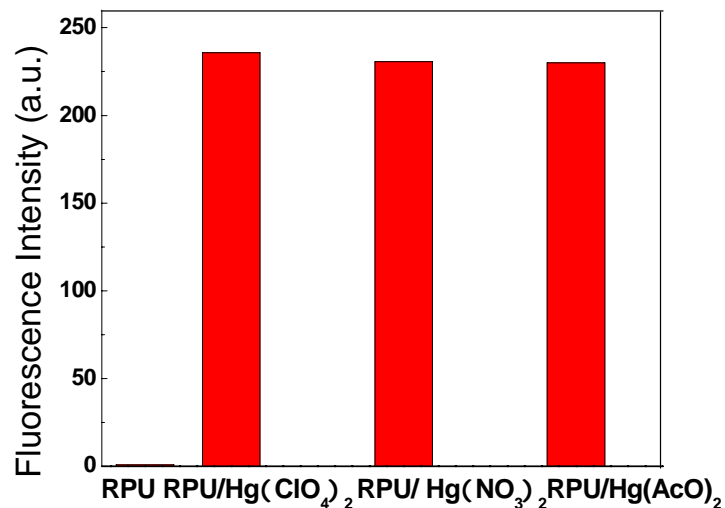

Fig. S8 Fluorescence intensity of **RPU** (1  $\mu$ M) in CH<sub>3</sub>CN/H<sub>2</sub>O upon the addition of 100 equiv Hg(ClO<sub>4</sub>)<sub>2</sub>, Hg(NO<sub>3</sub>)<sub>2</sub> and Hg(AcO)<sub>2</sub>, respectively.

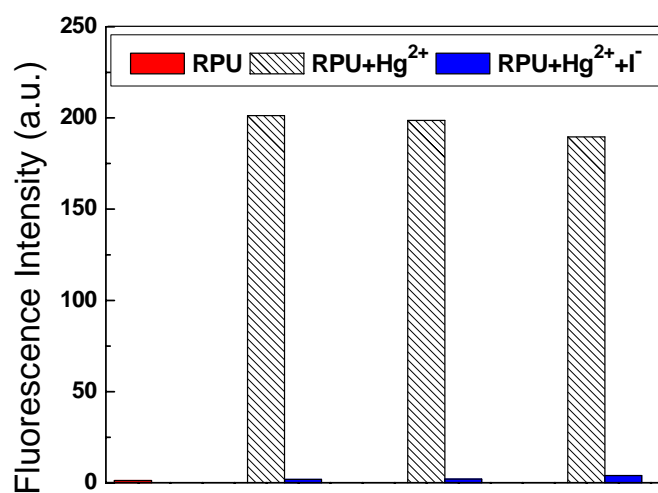

Fig. S9 The reversibility of the interaction between **RPU** in CH<sub>3</sub>CN/H<sub>2</sub>O (3/7, v/v) and Hg<sup>2+</sup> by the introduction of I<sup>-</sup> to the system. The red column represents the fluorescence intensity of **RPU** (1  $\mu$ M); the hatched columns represent the fluorescence intensity of system after addition of 70  $\mu$ M Hg<sup>2+</sup>; the blue columns represent the fluorescence intensity of system after introduction of I<sup>-</sup> (2 equiv to Hg<sup>2+</sup>) into the system. The experiments were repeated three times.



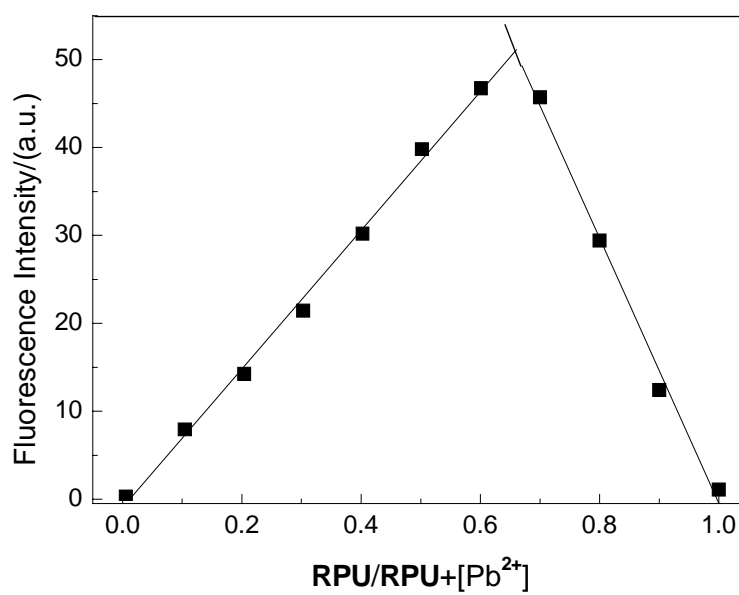

Fig.S10 Job's plot of the complex formed by **RPU/Pb<sup>2+</sup>**

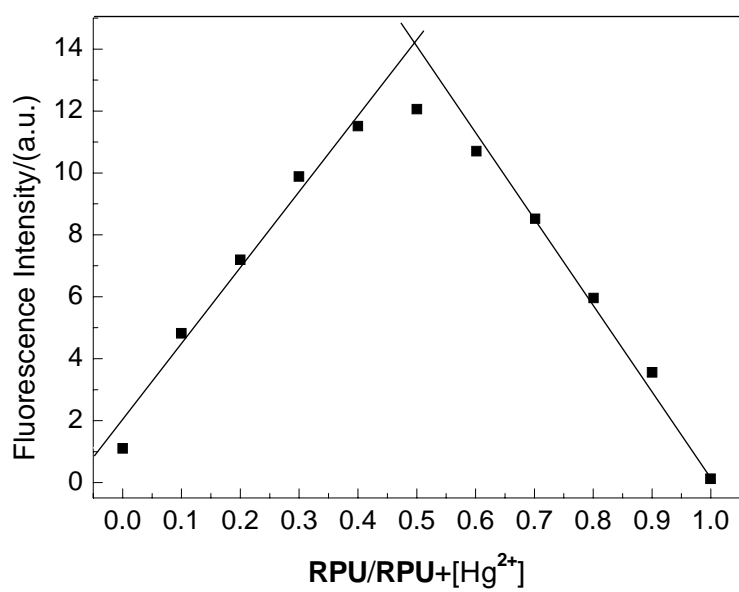

Fig. S11 Job's plot of the complex formed by **RPU/Hg<sup>2+</sup>**

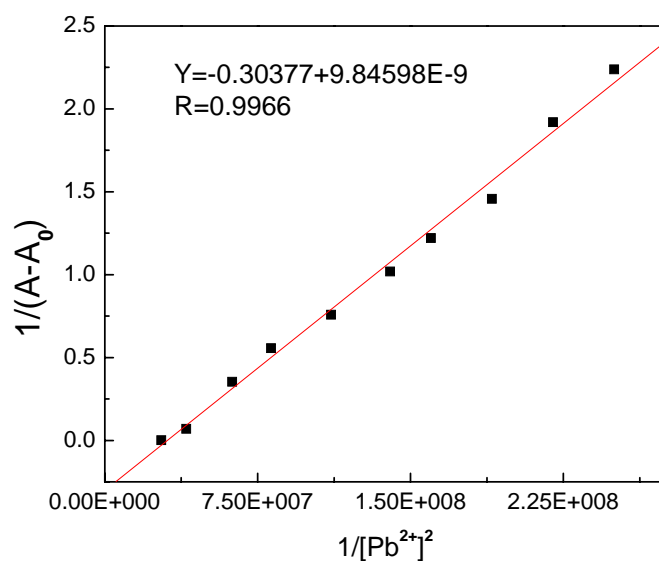

Fig. S12 Benesi-Hildebrand plot of **RPU** ( $1\mu\text{M}$  in  $\text{CH}_3\text{CN}$ , 560nm) assuming 2:1 stoichiometry between **RPU** and  $\text{Pb}^{2+}$

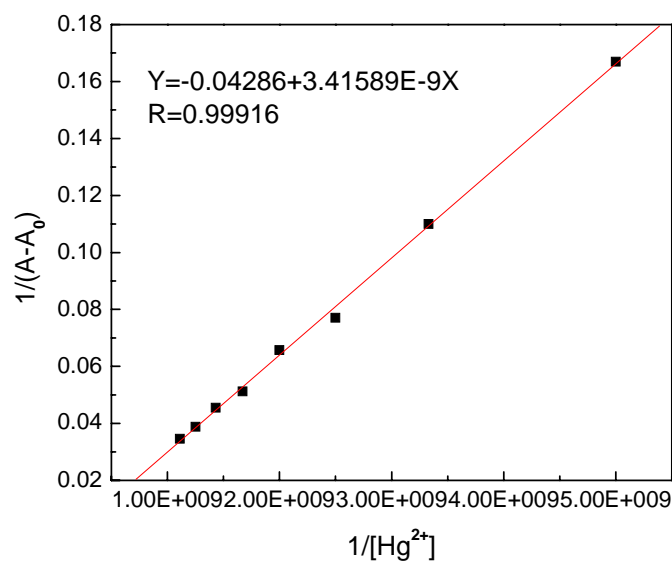

Fig. S13 Benesi-Hildebrand plot of **RPU** ( $1\mu\text{M}$  in  $\text{CH}_3\text{CN}/\text{H}_2\text{O} = 3/7$  v/v, 558nm) assuming 1:1 stoichiometry between **RPU** and  $\text{Hg}^{2+}$

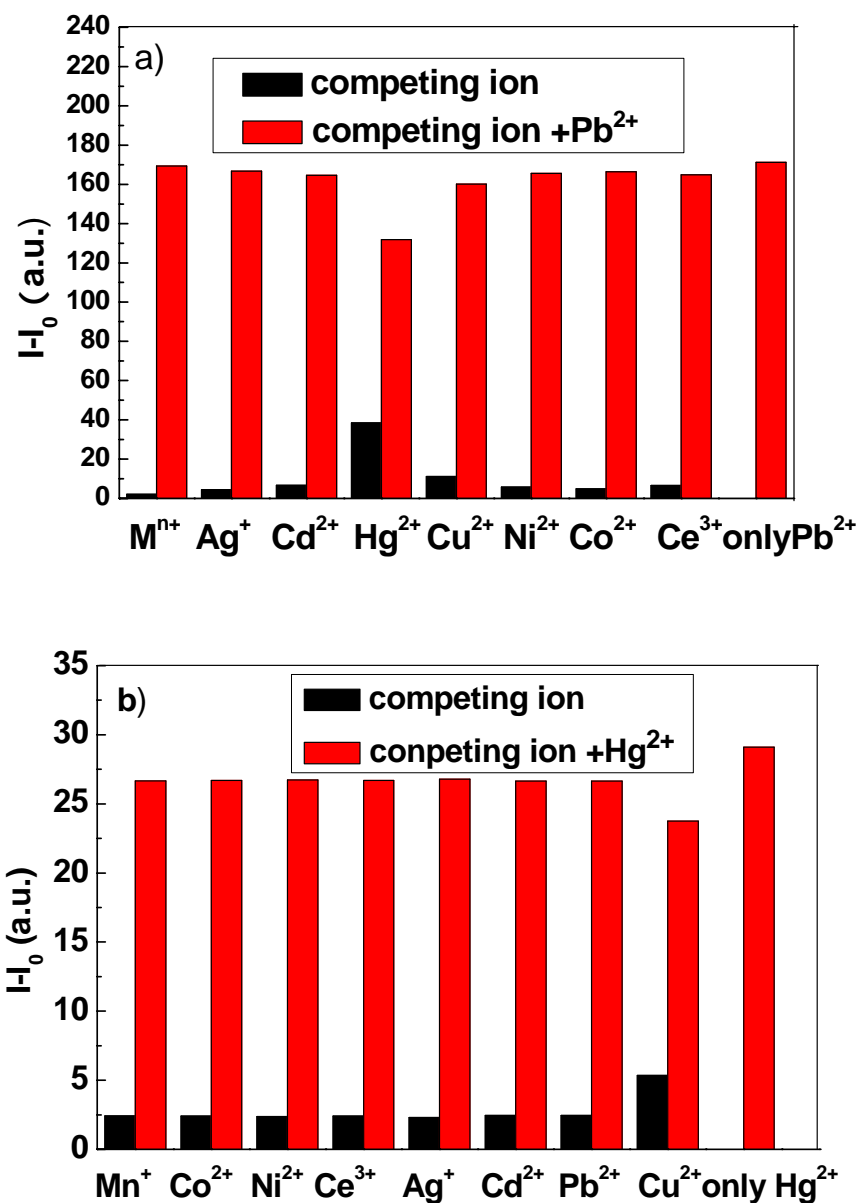

Fig.S14 Fluorescence intensity of RPU (1  $\mu\text{M}$ ) (a) upon the addition of 10  $\mu\text{M}$  Pb<sup>2+</sup> in the presence of 200  $\mu\text{M}$  background metal ions in CH<sub>3</sub>CN; (b) upon the addition of 30  $\mu\text{M}$  Hg<sup>2+</sup> in the presence of 200  $\mu\text{M}$  background metal ions (M<sup>n+</sup> denotes Na<sup>+</sup>, K<sup>+</sup>, Mg<sup>2+</sup>, Ca<sup>2+</sup>, Zn<sup>2+</sup>, Ba<sup>2+</sup>) in CH<sub>3</sub>CN/H<sub>2</sub>O (3/7, v/v).  $\lambda_{\text{exc}} = 530 \text{ nm}$ .

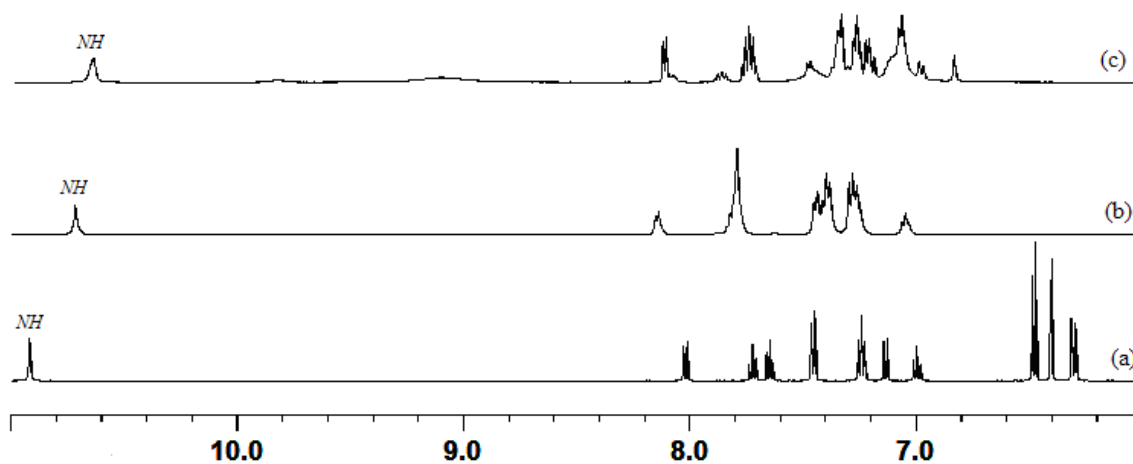

Fig. S15 Partial  $^1\text{H}$  NMR spectra of (a) **RPU** in  $\text{CD}_3\text{COCD}_3$ ; (b) **RPU** in  $\text{CD}_3\text{COCD}_3$  in the presence of excess  $\text{Hg}^{2+}$ ; (c) **RPU** in  $\text{CD}_3\text{COCD}_3$  in the presence of excess  $\text{Pb}^{2+}$  ion.

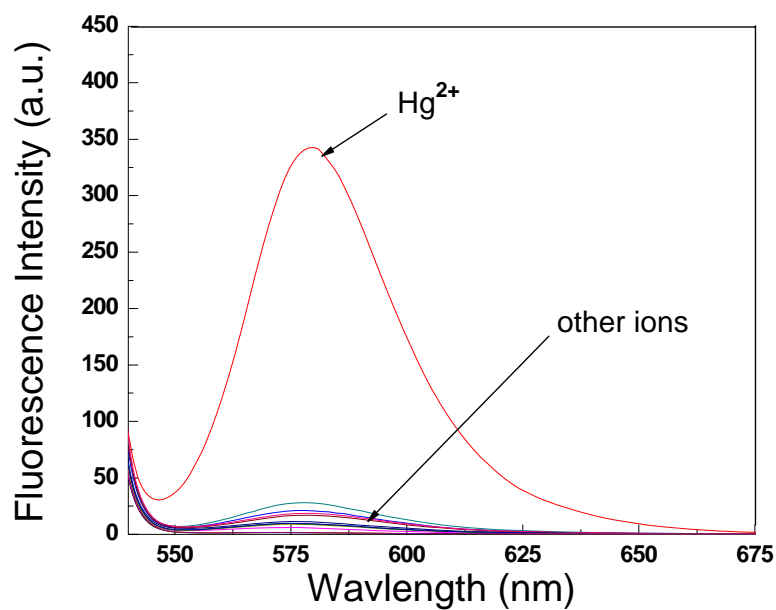

Fig. S16 Fluorescence intensity of **RPTU** ( $0.1\mu\text{M}$ ) in  $\text{CH}_3\text{CN}$  upon the addition of 20 equiv  $\text{Hg}^{2+}$  and 100 equiv other metal ions ( $\text{Pb}^{2+}$ ,  $\text{Mg}^{2+}$ ,  $\text{Ce}^{3+}$ ,  $\text{Cd}^{2+}$ ,  $\text{Na}^+$ ,  $\text{Cu}^{2+}$ ,  $\text{K}^+$ ,  $\text{Ag}^+$ ,  $\text{Co}^{2+}$ ,  $\text{Zn}^{2+}$ ,  $\text{Ni}^{2+}$ ,  $\text{Ba}^{2+}$  and  $\text{Ca}^{2+}$ )

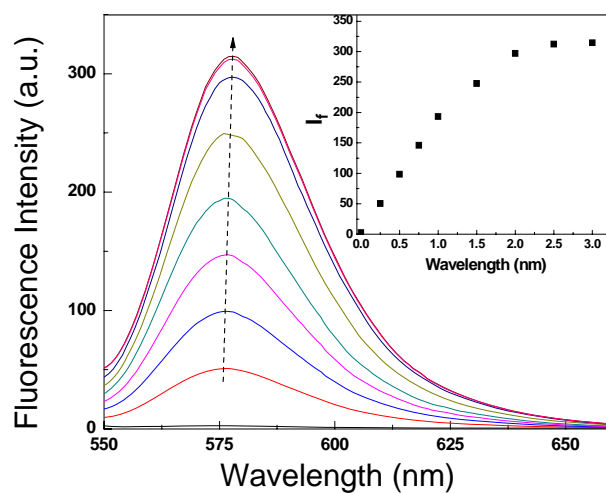

Fig. S17 Fluorescence ( $\lambda_{\text{ex}} = 530 \text{ nm}$ ) titration spectra of **RPTU** (0.1  $\mu\text{M}$ ) with  $\text{Hg}^{2+}$  (0-3  $\mu\text{M}$ ) in  $\text{CH}_3\text{CN}$

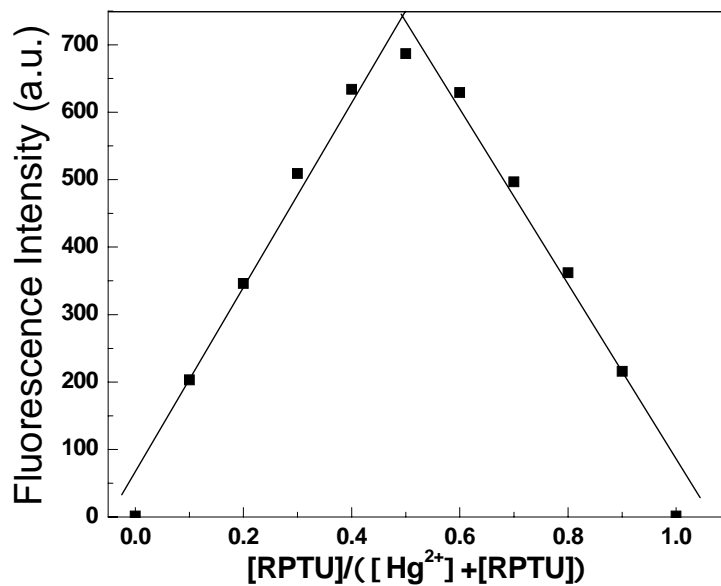

Fig. S18 Job's plot of the complex formed by **RPTU**/ $\text{Hg}^{2+}$

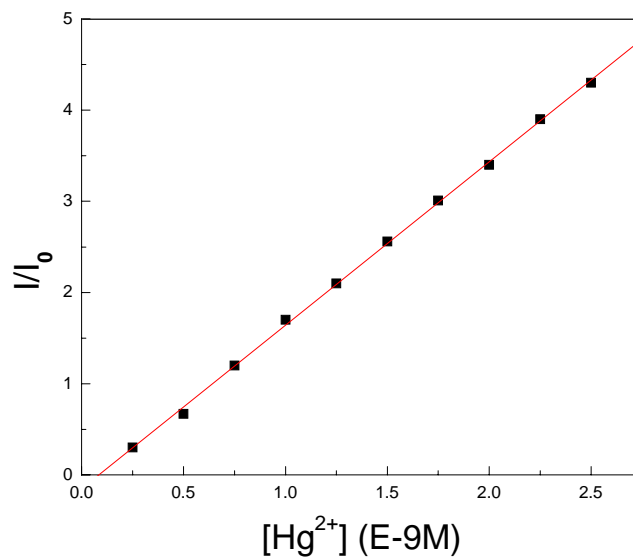

Fig.S19 An assay of **RPTU**(0.01  $\mu\text{M}$ ) for  $\text{Hg}^{2+}$  in  $\text{CH}_3\text{CN}$  ;  $\lambda_{\text{ex}} = 530 \text{ nm}$ .
